# Supplementary material for: The early dynamics of the SARS-CoV-2 epidemic in Portugal
Source: bioRxiv or medRxiv preprint supplement (doi:10.1101/2021.02.22.21252216), 2021-02-23
Supplement: Supplementary file [file media-1.pdf]

## Supplementary Information

### Authors list within the consortium entitled “Portuguese network for SARS-CoV-2 genomics”

All members (listed below) of the consortium entitled “Portuguese network for SARS-CoV-2 genomics” are authors of this manuscript.

| Author                  | Affiliation                                                                                                  | Contact                                                                                                                          |
|-------------------------|--------------------------------------------------------------------------------------------------------------|----------------------------------------------------------------------------------------------------------------------------------|
| Carlos Sousa            | Laboratório De Biologia Molecular da Unilabs Portugal                                                        | <a href="mailto:carlossousa@LAP.PT">carlossousa@LAP.PT</a>                                                                       |
| Pedro Cardoso           | Laboratório De Biologia Molecular da Unilabs Portugal                                                        | <a href="mailto:plnncardoso@gmail.com">plnncardoso@gmail.com</a>                                                                 |
| Carlos Cardoso          | Laboratório de Análises Clínicas Dr Joaquim Chaves                                                           | <a href="mailto:carlos.cardoso@jcs.pt">carlos.cardoso@jcs.pt</a>                                                                 |
| Laura Brum              | Synlab Lisboa                                                                                                | <a href="mailto:laura.brum@synlab.com">laura.brum@synlab.com</a>                                                                 |
| Lurdes Monteiro         | Secção de Patologia Molecular, Synlab Lisboa                                                                 | <a href="mailto:lurdes.monteiro@synlab.pt">lurdes.monteiro@synlab.pt</a>                                                         |
| Cristina Toscano        | Laboratório de Microbiologia e Biologia Molecular do Centro Hospitalar de Lisboa Ocidental                   | <a href="mailto:ctoscano@chlo.min-saude.pt">ctoscano@chlo.min-saude.pt</a>                                                       |
| Maria Ana Pessanha      | Laboratório de Microbiologia e Biologia Molecular do Centro Hospitalar de Lisboa Ocidental                   | <a href="mailto:mpessanha@chlo.min-saude.pt">mpessanha@chlo.min-saude.pt</a>                                                     |
| Ana Paula Dias          | Laboratório de Microbiologia e Biologia Molecular do Centro Hospitalar de Lisboa Ocidental                   | <a href="mailto:apdias@chlo.min-saude.pt">apdias@chlo.min-saude.pt</a>                                                           |
| João Dias               | Laboratório de Microbiologia e Biologia Molecular do Centro Hospitalar de Lisboa Ocidental                   | <a href="mailto:jepdias@chlo.min-saude.pt">jepdias@chlo.min-saude.pt</a>                                                         |
| Maria Helena Ramos      | Serviço de Microbiologia, Centro Hospitalar do Porto                                                         | <a href="mailto:directora.crmad@chporto.min-saude.pt">directora.crmad@chporto.min-saude.pt</a>                                   |
| Ana Constança           | Serviço de Microbiologia, Centro Hospitalar do Porto                                                         | <a href="mailto:anaconstancamendes.microbiologia@chporto.min-saude.pt">anaconstancamendes.microbiologia@chporto.min-saude.pt</a> |
| Agostinho José S. Lira  | Centro Hospitalar de Vila Nova de Gaia e Espinho                                                             | <a href="mailto:lira@chvng.min-saude.pt">lira@chvng.min-saude.pt</a>                                                             |
| Filomena Lacerda        | Centro Hospitalar de Vila Nova de Gaia e Espinho                                                             | <a href="mailto:filomenalacerda@chvng.min-saude.pt">filomenalacerda@chvng.min-saude.pt</a>                                       |
| Luis Marques Silva      | Centro Hospitalar de Vila Nova de Gaia e Espinho                                                             | <a href="mailto:luis.silva@chvng.min-saude.pt">luis.silva@chvng.min-saude.pt</a>                                                 |
| Maria Matos Figueiredo  | Centro Hospitalar de Vila Nova de Gaia e Espinho                                                             | <a href="mailto:maria.matos.figueiredo@chvng.min-saude.pt">maria.matos.figueiredo@chvng.min-saude.pt</a>                         |
| Nair Seixas             | Centro Hospitalar de Vila Nova de Gaia e Espinho                                                             | <a href="mailto:nair.seixas@chvng.min-saude.pt">nair.seixas@chvng.min-saude.pt</a>                                               |
| Jorge Meneses           | Centro Hospitalar de Vila Nova de Gaia e Espinho                                                             | <a href="mailto:jorge.meneses@chvng.min-saude.pt">jorge.meneses@chvng.min-saude.pt</a>                                           |
| Paulo Leandro           | Centro Hospitalar de Vila Nova de Gaia e Espinho                                                             | <a href="mailto:paulo.leandro@chvng.min-saude.pt">paulo.leandro@chvng.min-saude.pt</a>                                           |
| Alexandra Estrada       | Serviço de Patologia Clínica, Hospital de Braga                                                              | <a href="mailto:alexandra.estrada@hb.min-saude.pt">alexandra.estrada@hb.min-saude.pt</a>                                         |
| Fernando Branca         | Serviço de Patologia Clínica, Hospital de Braga                                                              | <a href="mailto:fernando.branca@hb.min-saude.pt">fernando.branca@hb.min-saude.pt</a>                                             |
| Aida M. Sousa Fernandes | Laboratório Regional de Saúde Pública Dr <sup>a</sup> Laura Ayres - ARS Algarve                              | <a href="mailto:afernandes@arsalgarve.min-saude.pt">afernandes@arsalgarve.min-saude.pt</a>                                       |
| Paula Barbeiro          | Serviço de Patologia Clínica - Unidade Local de Saúde Litoral Alentejano                                     | <a href="mailto:mariap.goncalves@ulsia.min-saude.pt">mariap.goncalves@ulsia.min-saude.pt</a>                                     |
| Inna Slobidnyk          | Serviço de Patologia Clínica - Unidade Local de Saúde Litoral Alentejano                                     | <a href="mailto:inna.slobidnyk@ulsia.min-saude.pt">inna.slobidnyk@ulsia.min-saude.pt</a>                                         |
| Maria João Peres        | Laboratório de Imunologia e Biologia Molecular, Centro Hospitalar de Setúbal                                 | <a href="mailto:maria.peres@chs.min-saude.pt">maria.peres@chs.min-saude.pt</a>                                                   |
| Rita Côrte-Real         | Laboratório Biologia Molecular- Serviço de Patologia Clínica, Centro Hospitalar Universitário Lisboa Central | <a href="mailto:rita.cortereal@chlc.min-saude.pt">rita.cortereal@chlc.min-saude.pt</a>                                           |
| Madalena Almeida Santos | Laboratório Biologia Molecular- Serviço de Patologia Clínica, Centro Hospitalar Universitário Lisboa Central | <a href="mailto:santos22@chlc.min-saude.pt">santos22@chlc.min-saude.pt</a>                                                       |
| Olga Costa              | Laboratório Biologia Molecular- Serviço de Patologia Clínica, Centro Hospitalar Universitário Lisboa Central | <a href="mailto:ompena@netcabo.pt">ompena@netcabo.pt</a>                                                                         |
| Conceição Godinho       | Laboratório Biologia Molecular- Serviço de Patologia Clínica, Centro Hospitalar Universitário Lisboa Central | <a href="mailto:mclopes@chlc.min-saude.pt">mclopes@chlc.min-saude.pt</a>                                                         |
| Paula Branquinho        | Laboratório Biologia Molecular- Serviço de Patologia Clínica, Centro Hospitalar Universitário Lisboa Central | <a href="mailto:biomolecular@sapo.pt">biomolecular@sapo.pt</a>                                                                   |

|                               |                                                                                                                |                                                                                                      |
|-------------------------------|----------------------------------------------------------------------------------------------------------------|------------------------------------------------------------------------------------------------------|
| Lurdes Lopes                  | Laboratório Biologia Molecular- Serviço de Patologia Clínica, Centro Hospitalar Universitário Lisboa Central   | <a href="mailto:biomolecular@sapo.pt">biomolecular@sapo.pt</a>                                       |
| Paula Soares                  | Laboratório Biologia Molecular- Serviço de Patologia Clínica, Centro Hospitalar Universitário Lisboa Central   | <a href="mailto:biomolecular@sapo.pt">biomolecular@sapo.pt</a>                                       |
| Lidia Santos                  | Laboratório Biologia Molecular- Serviço de Patologia Clínica, Centro Hospitalar Universitário Lisboa Central   | <a href="mailto:biomolecular@sapo.pt">biomolecular@sapo.pt</a>                                       |
| Patricia Miguel               | Laboratório Biologia Molecular- Serviço de Patologia Clínica, Centro Hospitalar Universitário Lisboa Central   | <a href="mailto:biomolecular@sapo.pt">biomolecular@sapo.pt</a>                                       |
| Isabel Dias                   | Laboratório Biologia Molecular- Serviço de Patologia Clínica, Centro Hospitalar Universitário Lisboa Central   | <a href="mailto:biomolecular@chlc.min-saude.pt">biomolecular@chlc.min-saude.pt</a>                   |
| Isabel Fernandes              | Laboratório Biologia Molecular- Serviço de Patologia Clínica, Centro Hospitalar Universitário Lisboa Central   | <a href="mailto:biomolecular@chlc.min-saude.pt">biomolecular@chlc.min-saude.pt</a>                   |
| Sónia Rodrigues               | Laboratório Biologia Molecular- Serviço de Patologia Clínica, Centro Hospitalar Universitário Lisboa Central   | <a href="mailto:biomolecular@chlc.min-saude.pt">biomolecular@chlc.min-saude.pt</a>                   |
| Fátima Vale                   | Serviço de Patologia Clínica, Unidade Local de Saúde da Guarda                                                 | <a href="mailto:fatima.vale@ulsguarda.min-saude.pt">fatima.vale@ulsguarda.min-saude.pt</a>           |
| Joana Ramos                   | Serviço de Patologia Clínica, Unidade Local de Saúde da Guarda                                                 | <a href="mailto:joana.ramos@ulsguarda.min-saude.pt">joana.ramos@ulsguarda.min-saude.pt</a>           |
| Rita Gralha                   | Serviço de Patologia Clínica, Unidade Local de Saúde da Guarda                                                 | <a href="mailto:rita.gralha@ulsguarda.min-saude.pt">rita.gralha@ulsguarda.min-saude.pt</a>           |
| Patricia Fonseca              | Serviço de Patologia Clínica, Unidade Local de Saúde da Guarda                                                 | <a href="mailto:patricia.fonseca@ulsguarda.min-saude.pt">patricia.fonseca@ulsguarda.min-saude.pt</a> |
| Nelson Ventura                | Serviço de Patologia Clínica, Unidade Local de Saúde da Guarda                                                 | <a href="mailto:nelson.ventura@ulsguarda.min-saude.pt">nelson.ventura@ulsguarda.min-saude.pt</a>     |
| Filomena Caldeira             | Hospital Espírito Santo, Évora                                                                                 | <a href="mailto:dir.patcli@hevora.min-saude.pt">dir.patcli@hevora.min-saude.pt</a>                   |
| Margarida Farinha             | Serviço de Patologia Clínica, Centro Hospitalar Tondela-Viseu                                                  | <a href="mailto:lab.patclinica@hstviseu.min-saude.pt">lab.patclinica@hstviseu.min-saude.pt</a>       |
| Ana Caldas                    | Serviço de Patologia Clínica, Centro Hospitalar Tondela-Viseu                                                  | <a href="mailto:8493@hstviseu.min-saude.pt">8493@hstviseu.min-saude.pt</a>                           |
| Carina de Fátima Rodrigues    | Centro de Investigação de Montanha, Instituto Politécnico de Bragança                                          | <a href="mailto:carina@ipb.pt">carina@ipb.pt</a>                                                     |
| Maria Alice Pinto             | Centro de Investigação de Montanha, Instituto Politécnico de Bragança                                          | <a href="mailto:apinto@ipb.pt">apinto@ipb.pt</a>                                                     |
| António Albuquerque           | Unidade Local de Saúde de Matosinhos                                                                           | <a href="mailto:antonio_albuquerque82@hotmail.com">antonio_albuquerque82@hotmail.com</a>             |
| Valquíria Alves               | Unidade Local de Saúde de Matosinhos                                                                           | <a href="mailto:valquiria.alves@ulsm.min-saude.pt">valquiria.alves@ulsm.min-saude.pt</a>             |
| João Carlos Sousa             | Life and Health Sciences Research Institute, School of Medicine, University of Minho, Braga                    | <a href="mailto:jcsousa@med.uminho.pt">jcsousa@med.uminho.pt</a>                                     |
| Maria Isabel Veiga            | Life and Health Sciences Research Institute, School of Medicine, University of Minho, Braga                    | <a href="mailto:mariaveiga@med.uminho.pt">mariaveiga@med.uminho.pt</a>                               |
| Diana Patrícia Pinto da Silva | Centro Médico da Praça                                                                                         | <a href="mailto:diana_silva_28@hotmail.com">diana_silva_28@hotmail.com</a>                           |
| Ricardo Filipe Romão Ferreira | Centro Médico da Praça                                                                                         | <a href="mailto:ricardo_ferreira1@hotmail.com">ricardo_ferreira1@hotmail.com</a>                     |
| Maria Beatriz Tomaz           | Beatriz Godinho Saúde                                                                                          | <a href="mailto:beatriztomaz@beatrizgodinho.pt">beatriztomaz@beatrizgodinho.pt</a>                   |
| Alfredo Rodrigues             | Beatriz Godinho Saúde                                                                                          | <a href="mailto:qualidade@beatrizgodinho.pt">qualidade@beatrizgodinho.pt</a>                         |
| Jácome Bruges Armas           | Serviço Especializado de Epidemiologia e Biologia Molecular, Hospital de Santo Espírito, Ilha Terceira, Açores | <a href="mailto:brugesarmas@gmail.com">brugesarmas@gmail.com</a>                                     |
| Ana Rita Couto                | Serviço Especializado de Epidemiologia e Biologia Molecular, Hospital de Santo Espírito, Ilha Terceira, Açores | <a href="mailto:Ana.RP.Couto@azores.gov.pt">Ana.RP.Couto@azores.gov.pt</a>                           |
| Paula Valente                 | Departamento de Saúde Pública e Planeamento, ARS Alentejo                                                      | <a href="mailto:Paula.Valente@arsalentejo.min-saude.pt">Paula.Valente@arsalentejo.min-saude.pt</a>   |
| Cláudia Nunes dos Santos      | Centro de Estudos de Doenças Crónicas, Faculdade de Ciências Médicas, Universidade Nova de Lisboa              | <a href="mailto:claudia.nunes.santos@nms.unl.pt">claudia.nunes.santos@nms.unl.pt</a>                 |
| Paulo Pereira                 | Centro de Estudos de Doenças Crónicas, Faculdade de Ciências Médicas, Universidade Nova de Lisboa              | <a href="mailto:paulo.pereira@nms.unl.pt">paulo.pereira@nms.unl.pt</a>                               |
| José Alves                    | Serviço de Patologia Clínica - Hospital Dr. Nélio Mendonça - SESARAM                                           | <a href="mailto:jose.alves@sesaram.pt">jose.alves@sesaram.pt</a>                                     |
| Graça Andrade                 | Serviço de Patologia Clínica - Hospital Dr. Nélio Mendonça - SESARAM                                           | <a href="mailto:drgraca@sesaram.pt">drgraca@sesaram.pt</a>                                           |
| Ludivina Freitas              | Serviço de Patologia Clínica - Hospital Dr. Nélio Mendonça - SESARAM                                           | <a href="mailto:ludivina.freitas@sesaram.pt">ludivina.freitas@sesaram.pt</a>                         |
| Bruna R. Gouveia              | Interactive Technologies Institute - LARSyS                                                                    | <a href="mailto:bruna.gouveia@iasaude.madeira.gov.pt">bruna.gouveia@iasaude.madeira.gov.pt</a>       |

|                                  |                                                                                                                            |                                                                                                                          |
|----------------------------------|----------------------------------------------------------------------------------------------------------------------------|--------------------------------------------------------------------------------------------------------------------------|
| Pedro Ramos                      | Secretaria Regional de Saúde e Proteção Civil - Governo Regional da Madeira                                                | <a href="mailto:pedro.ramos@madeira.gov.pt">pedro.ramos@madeira.gov.pt</a>                                               |
| Herberto Jesus                   | Instituto de Administração da Saúde da Madeira                                                                             | <a href="mailto:herberto.jesus@iasaude.madeira.gov.pt">herberto.jesus@iasaude.madeira.gov.pt</a>                         |
| Maurício Melim                   | Instituto de Administração da Saúde da Madeira                                                                             | <a href="mailto:mauricio.melim@iasaude.madeira.gov.pt">mauricio.melim@iasaude.madeira.gov.pt</a>                         |
| Hugo Sousa                       | Serviço de Virologia, Instituto Português de Oncologia do Porto                                                            | <a href="mailto:hugo.sousa@ipoporto.min-saude.pt">hugo.sousa@ipoporto.min-saude.pt</a>                                   |
| Inês Baldaque                    | Serviço de Virologia, Instituto Português de Oncologia do Porto                                                            | <a href="mailto:lbaldaque@ipoporto.min-saude.pt">lbaldaque@ipoporto.min-saude.pt</a>                                     |
| Daniela Silva                    | ALS Controlvet , Tondela                                                                                                   | <a href="mailto:Daniela.silva@alsglobal.com">Daniela.silva@alsglobal.com</a>                                             |
| Inês Gomes                       | ALS Controlvet, Tondela                                                                                                    | <a href="mailto:ines.gomes@alsglobal.com">ines.gomes@alsglobal.com</a>                                                   |
| Eliana Costa                     | Serviço de Patologia Clínica, Centro Hospitalar de Trás-os-Montes e Alto Douro                                             | <a href="mailto:ecsvalente@chtmad.min-saude.pt">ecsvalente@chtmad.min-saude.pt</a>                                       |
| Sara Sousa                       | Serviço de Patologia Clínica, Centro Hospitalar de Trás-os-Montes e Alto Douro                                             | <a href="mailto:sisousa@chtmad.min-saude.pt">sisousa@chtmad.min-saude.pt</a>                                             |
| Ana Miguel Matos                 | Laboratório de Análises Clínicas da Universidade de Coimbra                                                                | <a href="mailto:anamatos@ci.uc.pt">anamatos@ci.uc.pt</a>                                                                 |
| Miguel Babarro Jorreto           | Serviço de Imunohemoterapia, Unidade Local de Saúde do Alto Minho                                                          | <a href="mailto:miguel.jorreto@ulsam.min-saude.pt">miguel.jorreto@ulsam.min-saude.pt</a>                                 |
| Maria da Graça Maciel de Soveral | Serviço de Imunohemoterapia, Unidade Local de Saúde do Alto Minho                                                          | <a href="mailto:maria.graca.barbosa@ulsam.min-saude.pt">maria.graca.barbosa@ulsam.min-saude.pt</a>                       |
| Luís Silva                       | Serviço de Patologia Clínica, Hospital de Vila Franca de Xira                                                              | <a href="mailto:luis.silva@hvfx.pt">luis.silva@hvfx.pt</a>                                                               |
| Helena Ribeiro                   | Serviço de Patologia Clínica, Hospital de Vila Franca de Xira                                                              | <a href="mailto:helena.ribeiro@hvfx.pt">helena.ribeiro@hvfx.pt</a>                                                       |
| Rita Rodrigues                   | Serviço de Patologia Clínica, Hospital de Vila Franca de Xira                                                              | <a href="mailto:rita.silva.rodrigues@hvfx.pt">rita.silva.rodrigues@hvfx.pt</a>                                           |
| Teresa Salvado                   | Serviço de Patologia Clínica, Hospital de Vila Franca de Xira                                                              | <a href="mailto:teresa.salvado@hvfx.pt">teresa.salvado@hvfx.pt</a>                                                       |
| Luisa Mota-Vieira                | Unidade de Genética e Patologia Moleculares, Hospital do Divino Espírito Santo de Ponta Delgada, Ilha de S. Miguel, Açores | <a href="mailto:luisa.mq.vieira@azores.gov.pt">luisa.mq.vieira@azores.gov.pt</a>                                         |
| Rita C. Veloso                   | Unidade de Genética e Patologia Moleculares, Hospital do Divino Espírito Santo de Ponta Delgada, Ilha de S. Miguel, Açores | <a href="mailto:rita.tr.veloso@azores.gov.pt">rita.tr.veloso@azores.gov.pt</a>                                           |
| Claudia C. Branco                | Unidade de Genética e Patologia Moleculares, Hospital do Divino Espírito Santo de Ponta Delgada, Ilha de S. Miguel, Açores | <a href="mailto:claudia.ma.branco@azores.gov.pt">claudia.ma.branco@azores.gov.pt</a>                                     |
| Sónia Marta Santos Magalhães     | Hospital Agostinho Ribeiro-Felgueiras                                                                                      | <a href="mailto:analises.har@gmail.com">analises.har@gmail.com</a>                                                       |
| Helena Rodrigues                 | Laboratório Dra Helena Rodrigues, Valença                                                                                  | <a href="mailto:administracao@helenarodriguesanalisesclinicas.pt">administracao@helenarodriguesanalisesclinicas.pt</a>   |
| Francisca Rocha                  | Laboratório Dra Helena Rodrigues, Valença                                                                                  | <a href="mailto:franciscarocha@helenarodriguesanalisesclinicas.pt">franciscarocha@helenarodriguesanalisesclinicas.pt</a> |
| Sandra Paulo                     | Serviço de Patologia Clínica da Unidade Local de Saúde de Castelo Branco                                                   | <a href="mailto:sandra.paulo@ulscb.min-saude.pt">sandra.paulo@ulscb.min-saude.pt</a>                                     |
| Mariana Martins                  | Serviço de Patologia Clínica da Unidade Local de Saúde de Castelo Branco                                                   | <a href="mailto:mcmartins@ulscb.min-saude.pt">mcmartins@ulscb.min-saude.pt</a>                                           |
| Ricardo Rodrigues                | Serviço de Patologia Clínica da Unidade Local de Saúde de Castelo Branco                                                   | <a href="mailto:rrodrigues@ulscb.min-saude.pt">rrodrigues@ulscb.min-saude.pt</a>                                         |
| Mariana Viana                    | Centro Hospitalar Tâmega e Sousa, Penafiel                                                                                 | <a href="mailto:patclinica@chts.min-saude.pt">patclinica@chts.min-saude.pt</a>                                           |
| Maria Calle Vellés               | Centro Hospitalar Tâmega e Sousa, Penafiel                                                                                 | <a href="mailto:callemaria@chts.min-saude.pt">callemaria@chts.min-saude.pt</a>                                           |
| Miguel Pinheiro                  | iBiMED/Universidade de Aveiro                                                                                              | <a href="mailto:monsantopinheiro@gmail.com">monsantopinheiro@gmail.com</a>                                               |
| Miguel Fevereiro                 | Instituto Nacional de Investigação Agrária e Veterinária                                                                   | <a href="mailto:miguel.fevereiro@iniav.pt">miguel.fevereiro@iniav.pt</a>                                                 |
| Ana Margarida Henriques          | Instituto Nacional de Investigação Agrária e Veterinária                                                                   | <a href="mailto:margarida.henriques@iniav.pt">margarida.henriques@iniav.pt</a>                                           |
| Tiago Luís                       | Instituto Nacional de Investigação Agrária e Veterinária                                                                   | <a href="mailto:tiago.luis@iniav.pt">tiago.luis@iniav.pt</a>                                                             |
| Cathy Paulino                    | Instituto Gulbenkian de Ciência, Oeiras                                                                                    | <a href="mailto:cfpaulino@igc.gulbenkian.pt">cfpaulino@igc.gulbenkian.pt</a>                                             |
| João Costa                       | Instituto Gulbenkian de Ciência, Oeiras                                                                                    | <a href="mailto:jcosta@igc.gulbenkian.pt">jcosta@igc.gulbenkian.pt</a>                                                   |
| João Sobral                      | Instituto Gulbenkian de Ciência, Oeiras                                                                                    | <a href="mailto:jsobral@igc.gulbenkian.pt">jsobral@igc.gulbenkian.pt</a>                                                 |
| Susana Ladeiro                   | Instituto Gulbenkian de Ciência, Oeiras                                                                                    | <a href="mailto:sladeiro@igc.gulbenkian.pt">sladeiro@igc.gulbenkian.pt</a>                                               |
| Jorge Machado                    | Instituto Nacional de Saúde Dr Ricardo Jorge (INSA), Lisboa                                                                | <a href="mailto:jorge.machado@insa.min-saude.pt">jorge.machado@insa.min-saude.pt</a>                                     |
| Paula Bajanca-Lavado             | Instituto Nacional de Saúde Dr Ricardo Jorge (INSA), Lisboa                                                                | <a href="mailto:paula.lavado@insa.min-saude.pt">paula.lavado@insa.min-saude.pt</a>                                       |
| Maria José Borrego               | Instituto Nacional de Saúde Dr Ricardo Jorge (INSA), Lisboa                                                                | <a href="mailto:m.jose.borrego@insa.min-saude.pt">m.jose.borrego@insa.min-saude.pt</a>                                   |
| Líbia Zé-Zé                      | Instituto Nacional de Saúde Dr Ricardo Jorge (INSA), Lisboa                                                                | <a href="mailto:libia.zeze@insa.min-saude.pt">libia.zeze@insa.min-saude.pt</a>                                           |

|                             |                                                             |                                                                                                  |
|-----------------------------|-------------------------------------------------------------|--------------------------------------------------------------------------------------------------|
| Nuno Verdasca               | Instituto Nacional de Saúde Dr Ricardo Jorge (INSA), Lisboa | <a href="mailto:nuno.verdasca@insa.min-saude.pt">nuno.verdasca@insa.min-saude.pt</a>             |
| Sílvia Lopo                 | Instituto Nacional de Saúde Dr Ricardo Jorge (INSA), Lisboa | <a href="mailto:silvia.lopo@insa.min-saude.pt">silvia.lopo@insa.min-saude.pt</a>                 |
| Rita de Sousa               | Instituto Nacional de Saúde Dr Ricardo Jorge (INSA), Lisboa | <a href="mailto:rita.sousa@insa.min-saude.pt">rita.sousa@insa.min-saude.pt</a>                   |
| Maria João Gargate          | Instituto Nacional de Saúde Dr Ricardo Jorge (INSA), Lisboa | <a href="mailto:m.joao.gargate@insa.min-saude.pt">m.joao.gargate@insa.min-saude.pt</a>           |
| Susana Martins              | Instituto Nacional de Saúde Dr Ricardo Jorge (INSA), Lisboa | <a href="mailto:susana.martins@insa.min-saude.pt">susana.martins@insa.min-saude.pt</a>           |
| Isabel Lopes de Carvalho    | Instituto Nacional de Saúde Dr Ricardo Jorge (INSA), Lisboa | <a href="mailto:isabel.carvalho@insa.min-saude.pt">isabel.carvalho@insa.min-saude.pt</a>         |
| Célia Rodrigues Bettencourt | Instituto Nacional de Saúde Dr Ricardo Jorge (INSA), Lisboa | <a href="mailto:celia.betencourt@insa.min-saude.pt">celia.betencourt@insa.min-saude.pt</a>       |
| Carla Roque                 | Instituto Nacional de Saúde Dr Ricardo Jorge (INSA), Lisboa | <a href="mailto:carla.roque@insa.min-saude.pt">carla.roque@insa.min-saude.pt</a>                 |
| Leonor Silveira             | Instituto Nacional de Saúde Dr Ricardo Jorge (INSA), Lisboa | <a href="mailto:leonor.silveira@insa.min-saude.pt">leonor.silveira@insa.min-saude.pt</a>         |
| João Rodrigues              | Instituto Nacional de Saúde Dr Ricardo Jorge (INSA), Lisboa | <a href="mailto:joao.rodrigues@insa.min-saude.pt">joao.rodrigues@insa.min-saude.pt</a>           |
| Ivone Água-Doce             | Instituto Nacional de Saúde Dr Ricardo Jorge (INSA), Lisboa | <a href="mailto:ivone.agua-doce@insa.min-saude.pt">ivone.agua-doce@insa.min-saude.pt</a>         |
| Rita Cordeiro               | Instituto Nacional de Saúde Dr Ricardo Jorge (INSA), Lisboa | <a href="mailto:rita.cordeiro@insa.min-saude.pt">rita.cordeiro@insa.min-saude.pt</a>             |
| Ana Pelerito                | Instituto Nacional de Saúde Dr Ricardo Jorge (INSA), Lisboa | <a href="mailto:ana.pelerito@insa.min-saude.pt">ana.pelerito@insa.min-saude.pt</a>               |
| Cristina Correia            | Instituto Nacional de Saúde Dr Ricardo Jorge (INSA), Lisboa | <a href="mailto:cristina.correia@insa.min-saude.pt">cristina.correia@insa.min-saude.pt</a>       |
| Vera Manageiro              | Instituto Nacional de Saúde Dr Ricardo Jorge (INSA), Lisboa | <a href="mailto:vera.manageiro@insa.min-saude.pt">vera.manageiro@insa.min-saude.pt</a>           |
| Raquel Rocha                | Instituto Nacional de Saúde Dr Ricardo Jorge (INSA), Lisboa | <a href="mailto:maria.rocha@insa.min-saude.pt">maria.rocha@insa.min-saude.pt</a>                 |
| Raquel Neves                | Instituto Nacional de Saúde Dr Ricardo Jorge (INSA), Lisboa | <a href="mailto:raquel.neves@insa.min-saude.pt">raquel.neves@insa.min-saude.pt</a>               |
| Paula Palminha              | Instituto Nacional de Saúde Dr Ricardo Jorge (INSA), Lisboa | <a href="mailto:paula.palminha@insa.min-saude.pt">paula.palminha@insa.min-saude.pt</a>           |
| Cristina Veríssimo          | Instituto Nacional de Saúde Dr Ricardo Jorge (INSA), Lisboa | <a href="mailto:cristina.verissimo@insa.min-saude.pt">cristina.verissimo@insa.min-saude.pt</a>   |
| Elizabeth Pádua             | Instituto Nacional de Saúde Dr Ricardo Jorge (INSA), Lisboa | <a href="mailto:elizabeth.padua@insa.min-saude.pt">elizabeth.padua@insa.min-saude.pt</a>         |
| Rita Matos                  | Instituto Nacional de Saúde Dr Ricardo Jorge (INSA), Lisboa | <a href="mailto:rita.matos@insa.min-saude.pt">rita.matos@insa.min-saude.pt</a>                   |
| Susana Silva                | Instituto Nacional de Saúde Dr Ricardo Jorge (INSA), Lisboa | <a href="mailto:susana.pereira@insa.min-saude.pt">susana.pereira@insa.min-saude.pt</a>           |
| Alexandra Nunes             | Instituto Nacional de Saúde Dr Ricardo Jorge (INSA), Lisboa | <a href="mailto:alexandra.nunes@insa.min-saude.pt">alexandra.nunes@insa.min-saude.pt</a>         |
| Pedro Pechirra              | Instituto Nacional de Saúde Dr Ricardo Jorge (INSA), Lisboa | <a href="mailto:pedro.pechirra@insa.min-saude.pt">pedro.pechirra@insa.min-saude.pt</a>           |
| Inês Costa                  | Instituto Nacional de Saúde Dr Ricardo Jorge (INSA), Lisboa | <a href="mailto:ines.costa@insa.min-saude.pt">ines.costa@insa.min-saude.pt</a>                   |
| Mónica Oleastro             | Instituto Nacional de Saúde Dr Ricardo Jorge (INSA), Lisboa | <a href="mailto:monica.oleastro@insa.min-saude.pt">monica.oleastro@insa.min-saude.pt</a>         |
| Carla Feliciano             | Instituto Nacional de Saúde Dr Ricardo Jorge (INSA), Lisboa | <a href="mailto:carla.feliciano@insa.min-saude.pt">carla.feliciano@insa.min-saude.pt</a>         |
| Isabel Albergaria           | Instituto Nacional de Saúde Dr Ricardo Jorge (INSA), Lisboa | <a href="mailto:m.isabel.albergaria@insa.min-saude.pt">m.isabel.albergaria@insa.min-saude.pt</a> |
| Fernanda Vilarinho          | Instituto Nacional de Saúde Dr Ricardo Jorge (INSA), Lisboa | <a href="mailto:fernanda.vilarinho@insa.min-saude.pt">fernanda.vilarinho@insa.min-saude.pt</a>   |
| Márcia Faria                | Instituto Nacional de Saúde Dr Ricardo Jorge (INSA), Lisboa | <a href="mailto:marcia.faria@insa.min-saude.pt">marcia.faria@insa.min-saude.pt</a>               |
| Margarida Vaz               | Instituto Nacional de Saúde Dr Ricardo Jorge (INSA), Lisboa | <a href="mailto:margarida.vaz@insa.min-saude.pt">margarida.vaz@insa.min-saude.pt</a>             |
| Patrícia Barros             | Instituto Nacional de Saúde Dr Ricardo Jorge (INSA), Lisboa | <a href="mailto:patricia.barros@insa.min-saude.pt">patricia.barros@insa.min-saude.pt</a>         |
| Raquel Rodrigues            | Instituto Nacional de Saúde Dr Ricardo Jorge (INSA), Lisboa | <a href="mailto:raquel.rodrigues@insa.min-saude.pt">raquel.rodrigues@insa.min-saude.pt</a>       |
| José Vicente Constantino    | Instituto Nacional de Saúde Dr Ricardo Jorge (INSA), Lisboa | <a href="mailto:jose.constantino@insa.min-saude.pt">jose.constantino@insa.min-saude.pt</a>       |
| Rita Macedo                 | Instituto Nacional de Saúde Dr Ricardo Jorge (INSA), Lisboa | <a href="mailto:rita.macedo@insa.min-saude.pt">rita.macedo@insa.min-saude.pt</a>                 |
| Raquel Sabino               | Instituto Nacional de Saúde Dr Ricardo Jorge (INSA), Lisboa | <a href="mailto:raquel.sabino@insa.min-saude.pt">raquel.sabino@insa.min-saude.pt</a>             |
| Idalina Ferreira            | Instituto Nacional de Saúde Dr Ricardo Jorge (INSA), Lisboa | <a href="mailto:idalina.ferreira@insa.min-saude.pt">idalina.ferreira@insa.min-saude.pt</a>       |
| Sónia Silva                 | Instituto Nacional de Saúde Dr Ricardo Jorge (INSA), Lisboa | <a href="mailto:sonia.silva@insa.min-saude.pt">sonia.silva@insa.min-saude.pt</a>                 |
| Anabela Vilares             | Instituto Nacional de Saúde Dr Ricardo Jorge (INSA), Lisboa | <a href="mailto:anabela.vilares@insa.min-saude.pt">anabela.vilares@insa.min-saude.pt</a>         |
